# Supplementary material for: Variability of surface climate in simulations of past and future
Source: Copernicus journal article supplement (doi:10.5194/esd-2019-92), 2020-02-03
Supplement: Supplementary file 1 [file esd-2019-92-supplement.pdf]

# Supplementary Material: Variability of surface climate in simulations of past and future

Kira Rehfeld<sup>1</sup>, Raphaël Hébert<sup>2</sup>, Juan M. Lora<sup>3</sup>, Marcus Lofverstrom<sup>4</sup>, and Chris Brierley<sup>5</sup>

<sup>1</sup>Institute of Environmental Physics, Ruprecht-Karls-Universität Heidelberg, INF 229, 69120 Heidelberg, Germany

<sup>2</sup>Alfred-Wegener Institute Helmholtz-Center for Polar- and Marine Research, Telegrafenberg A45, 14473 Potsdam, Germany

<sup>3</sup>Department of Geology and Geophysics, Yale University, 210 Whitney Ave, New Haven, CT 06520, US

<sup>4</sup>Department of Geosciences, University of Arizona, 1040 E. 4th Street, Tucson, AZ 85721, US

<sup>5</sup>Department of Geography, University College London, London, WC1E 6BT, UK

## List of Figures

|    |    |                                                                                                                                                                                                                                                                                                                                                                                                                                                                         |   |
|----|----|-------------------------------------------------------------------------------------------------------------------------------------------------------------------------------------------------------------------------------------------------------------------------------------------------------------------------------------------------------------------------------------------------------------------------------------------------------------------------|---|
|    | S1 | Areas considered in the calculation of the modes of variability (Sect. 2 in the manuscript). . . . .                                                                                                                                                                                                                                                                                                                                                                    | 2 |
|    | S2 | As in Fig. 5, but for years of anomalously low precipitation (one standard deviation below the average). . . . .                                                                                                                                                                                                                                                                                                                                                        | 3 |
| 5  | S3 | Composite of the precipitation anomalies (in mm/day) associated with low precipitation (left) and high precipitation (right) extremes in five regions with Mediterranean climates as in Suppl. Fig. S2 and Fig. 5 in the manuscript. . . . .                                                                                                                                                                                                                            | 4 |
|    | S4 | Shown are the scaling exponents $\beta$ for the selected experiments (rows) and for three variables of interest (columns), fitted between timescales of 4 months and 20 years. White regions indicate zero scaling (i.e., "white" spectra), reddish colors indicate positive scaling ("red" spectra showing increasing variance with timescale) and blue-ish colors indicating negative scaling ("blue" spectra indicating decreasing variance with timescale). . . . . | 5 |
| 10 | S5 | Change in the scaling of the spectral exponent $\beta$ , as shown on figure S4, in the experiments with respect to the <i>piControl</i> experiment. . . . .                                                                                                                                                                                                                                                                                                             | 6 |

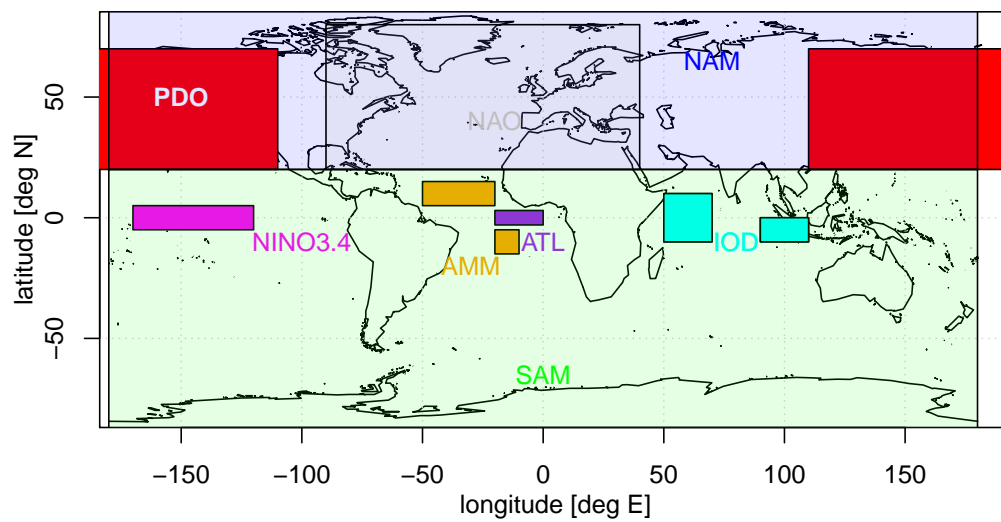

**Figure S1.** Areas considered in the calculation of the modes of variability (Sect. 2 in the manuscript).

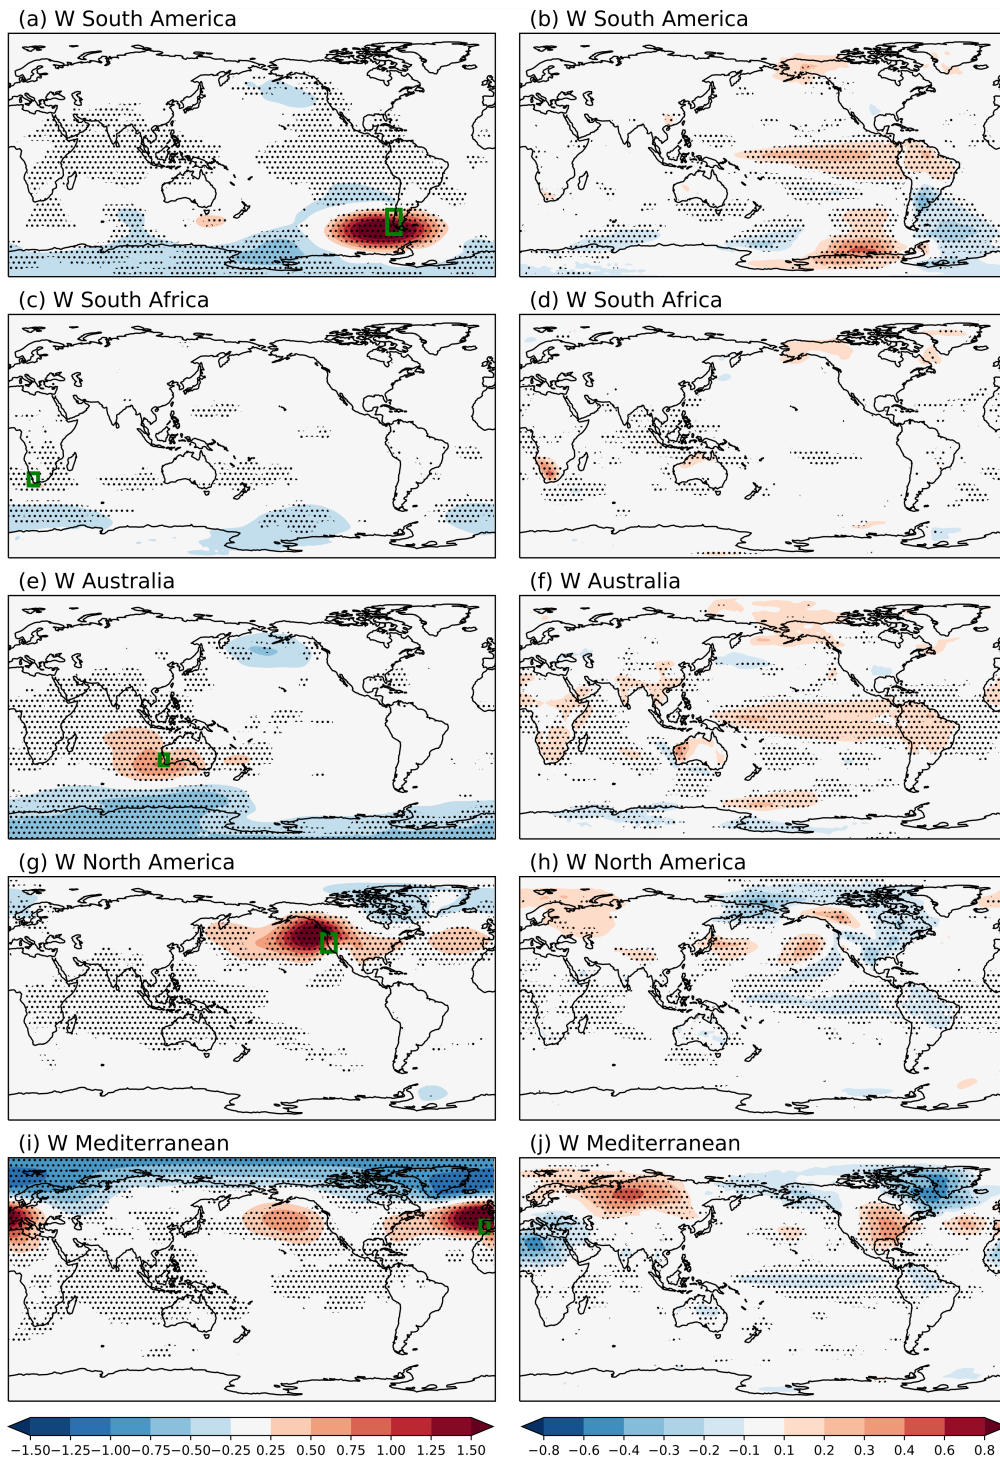

**Figure S2.** As in Fig. 5, but for years of anomalously low precipitation (one standard deviation below the average).

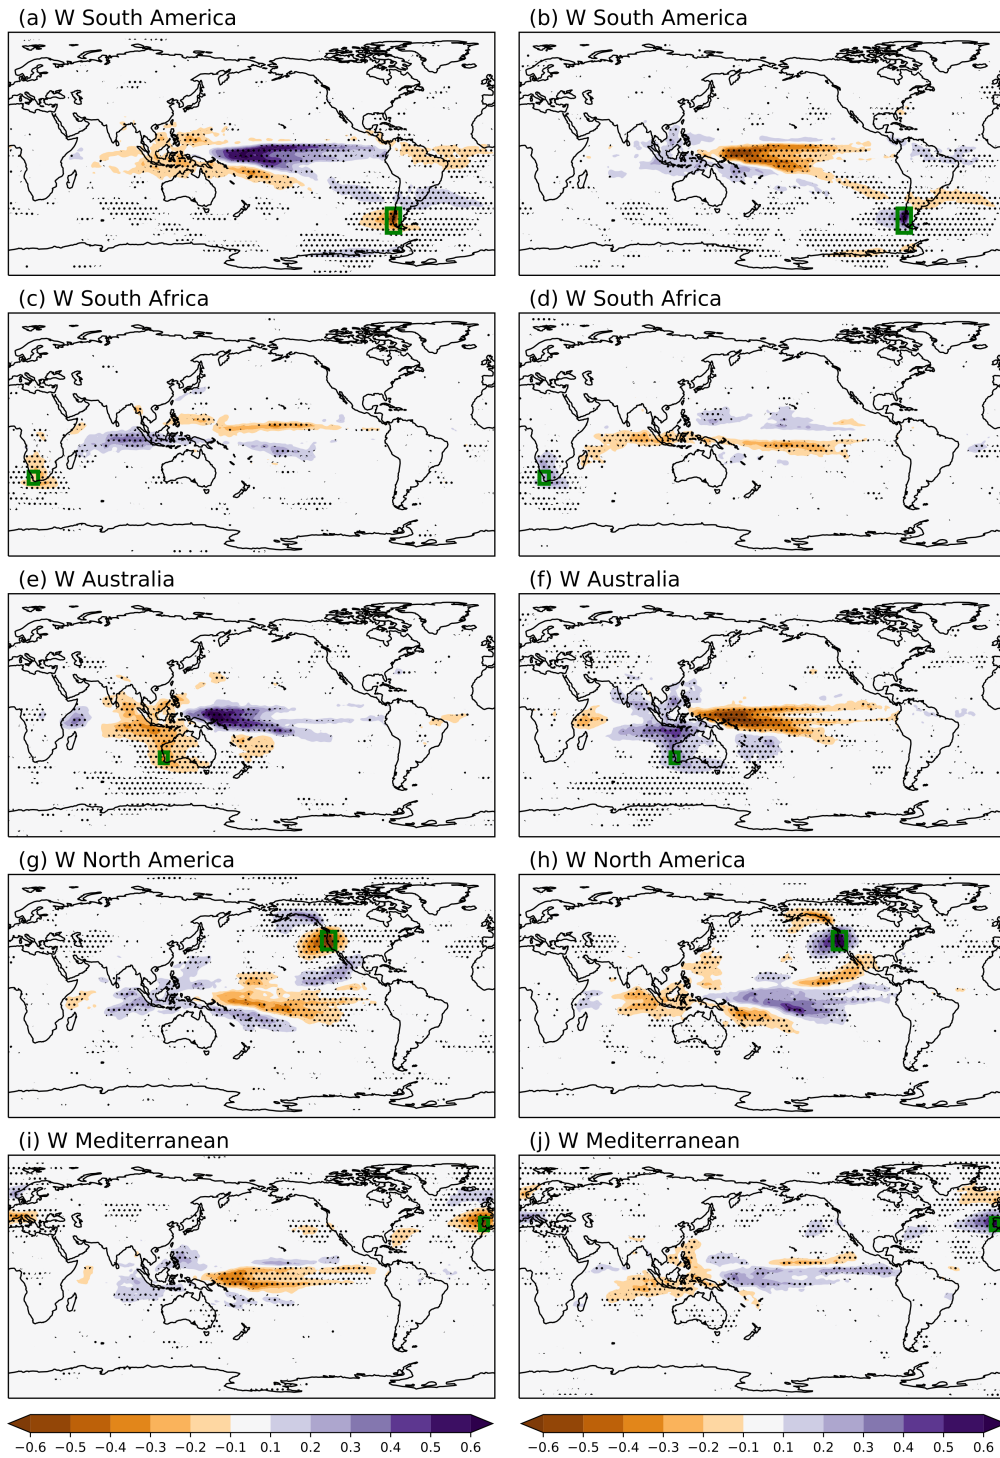

**Figure S3.** Composite of the precipitation anomalies (in mm/day) associated with low precipitation (left) and high precipitation (right) extremes in five regions with Mediterranean climates as in Suppl. Fig. S2 and Fig. 5 in the manuscript.

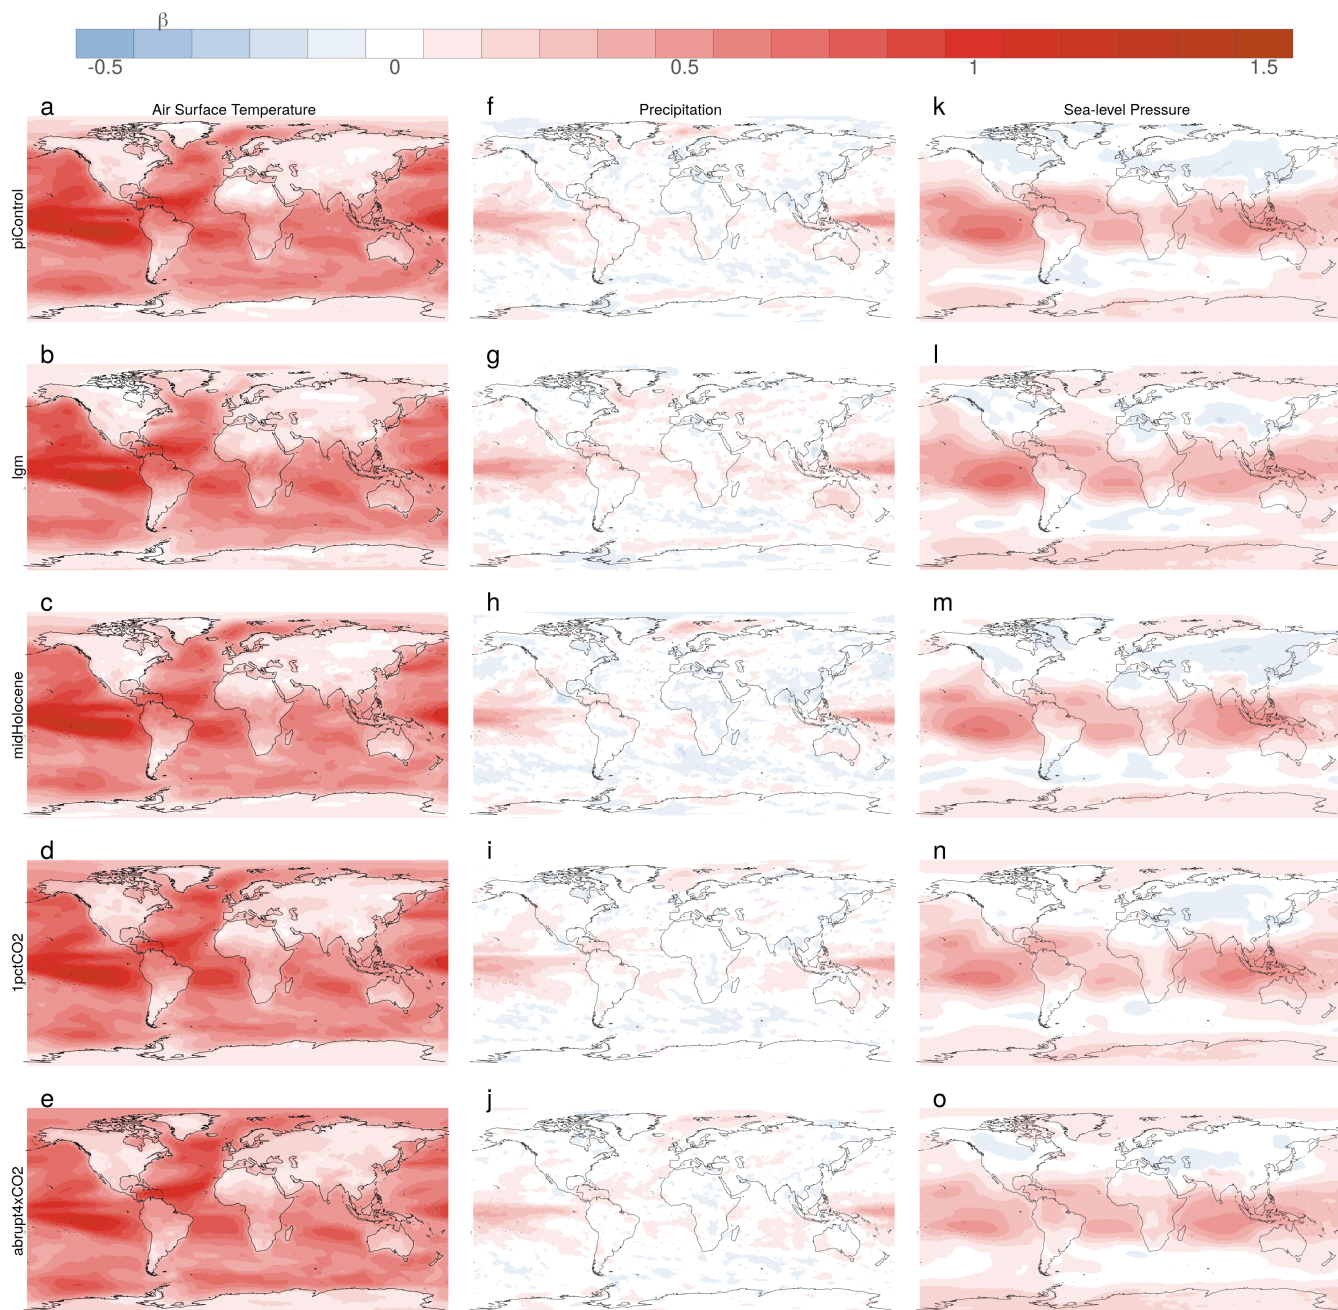

**Figure S4.** Shown are the scaling exponents  $\beta$  for the selected experiments (rows) and for three variables of interest (columns), fitted between timescales of 4 months and 20 years. White regions indicate zero scaling (i.e., "white" spectra), reddish colors indicate positive scaling ("red" spectra showing increasing variance with timescale) and blue-ish colors indicating negative scaling ("blue" spectra indicating decreasing variance with timescale).

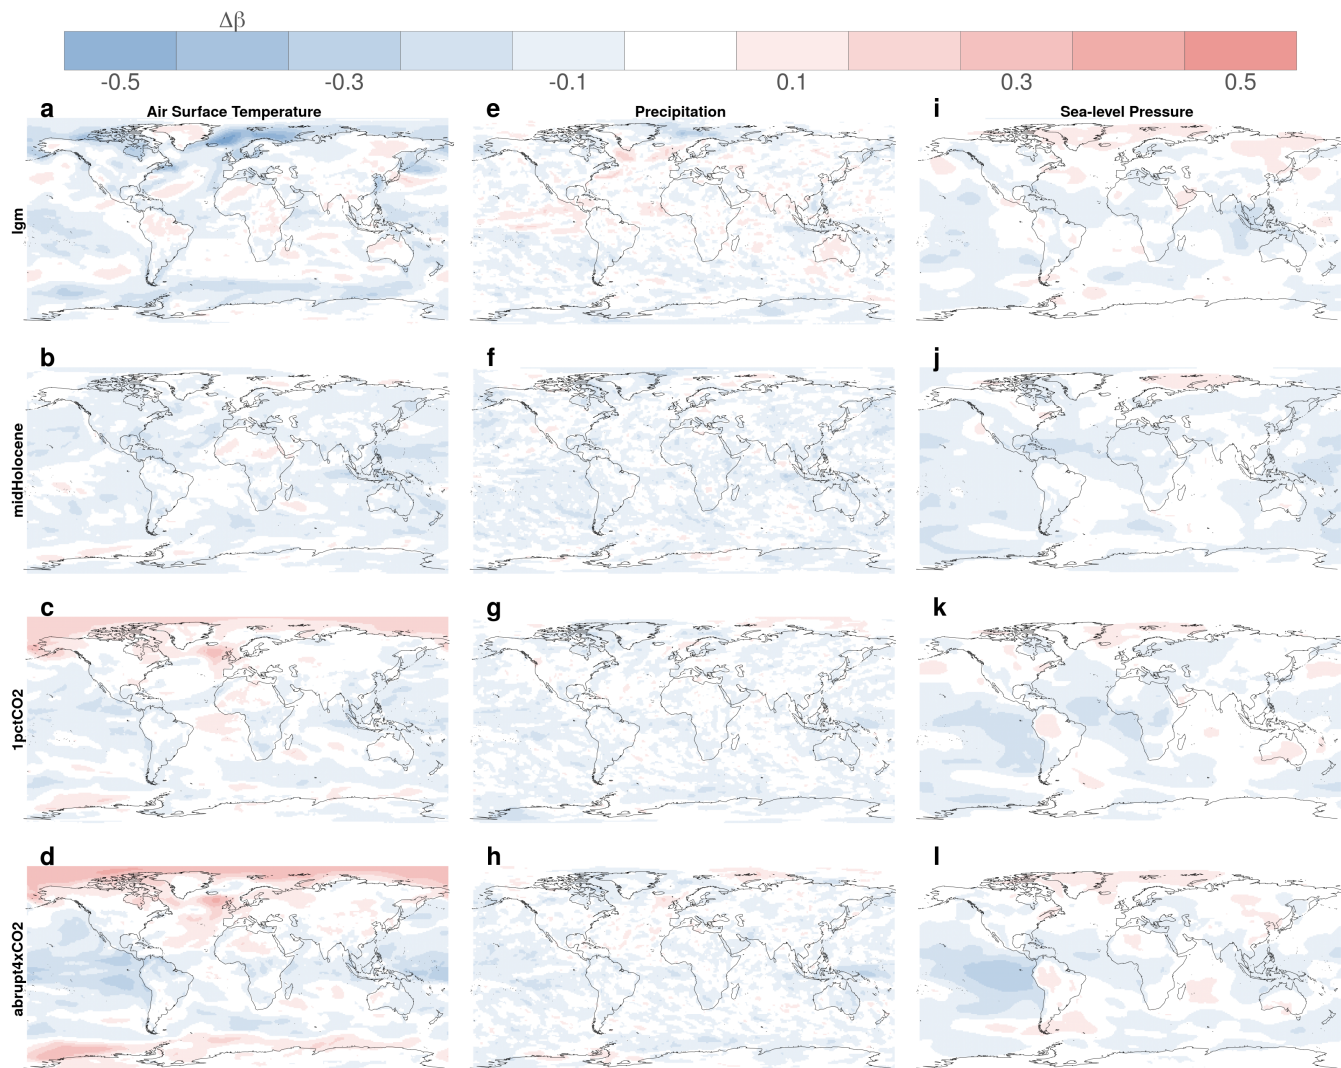

**Figure S5.** Change in the scaling of the spectral exponent  $\beta$ , as shown on figure S4, in the experiments with respect to the *piControl* experiment.
